# Supplementary material for: hLMSC Secretome Affects Macrophage Activity Differentially Depending on Lung-Mimetic Environments
Source: Cells. 2022 Jun 8;11(12):1866. doi: 10.3390/cells11121866 (PMC9221297; doi:10.3390/cells11121866)
Supplement: Supplementary file 1 [file cells-11-01866-s001.zip]

Archive with 4 entries (4 files):
- FACS gating strategy.pdf
- Figure S2.tif
- Supplement FACS data.xlsx
- Supplement Material and methods v2.pdf
