# Supplementary material for: hLMSC Secretome Affects Macrophage Activity Differentially Depending on Lung-Mimetic Environments
Source: Cells. 2022 Jun 8;11(12):1866. doi: 10.3390/cells11121866 (PMC9221297; doi:10.3390/cells11121866)
Supplement: Supplementary file 1 [file cells-11-01866-s001.zip › Supplement FACS data.xlsx]

## Sheet: Sheet1
Marker	Strain	Enviroment	Patient 3	Patient 6	Patient 7	Patient 2	Patient 4	Patient 5
% of live cells M1	Static	M0 Plastic	12.3	5.13	2.69	5.22	2.59	1.99
% of live cells M1	Static	M0 L-Scaffold	5.68	8.8	4.5	7.19	1.38	2.35
% of live cells M1	Static	M0 L-Hydrogel	5.98	8.9	3.52	5.12	2.83	0.53
% of live cells M1	Static	M1 Plastic	72.6	62.5	70.8	38.4	47.4	36.9
% of live cells M1	Static	M1 L-Scaffold	75.7	43.3	51	36		35.3
% of live cells M1	Static	M1 L-Hydrogel	61.2	72.7	45	34.1	44.3	41.1
% of live cells M1	Static	M2 Plastic	6.24	19.2	2.97	4.06	4.25	4.89
% of live cells M1	Static	M2 L-Scaffold	24.6	11.5	6.87	6.58	8.44	4.43
% of live cells M1	Static	M2 L-Hydrogel	11.6	6.08	7.05	9.19	3.19	4.91
% of live cells M1	Cyclic Stretch	M0 Plastic	8.73	7.17	4.59	2.69	1.32	3.78
% of live cells M1	Cyclic Stretch	M0 L-Scaffold	5.79	10.6	4.86	5.04	3.71	1.36
% of live cells M1	Cyclic Stretch	M0 L-Hydrogel	4.04	4.13	8.51	3.14	3.41	0
% of live cells M1	Cyclic Stretch	M1 Plastic	72.6	60	72.4	35.5	13.3	34.5
% of live cells M1	Cyclic Stretch	M1 L-Scaffold	73.5	31	46.7	23.2	18.4	36.4
% of live cells M1	Cyclic Stretch	M1 L-Hydrogel	55.3	66.9	61	40.6	40.5	28.4
% of live cells M1	Cyclic Stretch	M2 Plastic	8.27	13.9	8.43	4.42	5.06	2.97
% of live cells M1	Cyclic Stretch	M2 L-Scaffold	9.42	13	4.06	4.63	6.41	5.79
% of live cells M1	Cyclic Stretch	M2 L-Hydrogel	22	3.68	9.73	4.27	3.29	9.71
% of live cells M2a	Static	M0 Plastic	0.085	0	0.041	0.047	0.00832	0.00712
% of live cells M2a	Static	M0 L-Scaffold	0	0.092	0	0	0	0
% of live cells M2a	Static	M0 L-Hydrogel	0	0	0	0	0.016	0
% of live cells M2a	Static	M1 Plastic	0	1.18	0	0.58	0	0
% of live cells M2a	Static	M1 L-Scaffold	0.026	1.98	3.08	0	0	0
% of live cells M2a	Static	M1 L-Hydrogel	0.76	0	3.99	0	0	0
% of live cells M2a	Static	M2 Plastic	3.86	7.78	2.83	1.34	3.04	2.32
% of live cells M2a	Static	M2 L-Scaffold	15.6	6.96	8.03	0.4	2.32	2.81
% of live cells M2a	Static	M2 L-Hydrogel	8.51	1.31	9.4	0.52	3.26	2.58
% of live cells M2a	Cyclic Stretch	M0 Plastic	0.022	0.17	0.00768	0	0	0.013
% of live cells M2a	Cyclic Stretch	M0 L-Scaffold	0	0.19	0.01	0	0.042	0
% of live cells M2a	Cyclic Stretch	M0 L-Hydrogel	0.18	0	0.084	0	0	0
% of live cells M2a	Cyclic Stretch	M1 Plastic	0	0.22	0	0	0	0
% of live cells M2a	Cyclic Stretch	M1 L-Scaffold	0	3.03	3.75	0	0.23	0
% of live cells M2a	Cyclic Stretch	M1 L-Hydrogel	1.41	0	1.54	0	0	0
% of live cells M2a	Cyclic Stretch	M2 Plastic	5.1	6.06	7.2	0.7	1.52	1.76
% of live cells M2a	Cyclic Stretch	M2 L-Scaffold	6.32	5.7	3.68	0.22	2.36	2.65
% of live cells M2a	Cyclic Stretch	M2 L-Hydrogel	3.5	2.61	5.47	0.42	1.55	1.97
% of live cells M2b	Static	M0 Plastic	0.9	1.41	0.87	1.99	0.49	0.58
% of live cells M2b	Static	M0 L-Scaffold	0.39	0.84	0.4	2.69	0.4	0.4
% of live cells M2b	Static	M0 L-Hydrogel	0.73	1.24	0.62	0	0.88	0.32
% of live cells M2b	Static	M1 Plastic	3.16	2.11	1.43	2.91	0	0.49
% of live cells M2b	Static	M1 L-Scaffold	1.82	1.64	2.95	0.9	0	1.1
% of live cells M2b	Static	M1 L-Hydrogel	2.39	3.81	1.74	0	2.88	1.79
% of live cells M2b	Static	M2 Plastic	1.1	1.21	0.55	1.68	0.7	0.54
% of live cells M2b	Static	M2 L-Scaffold	1.54	1.27	0.53	3.51	2.56	0.36
% of live cells M2b	Static	M2 L-Hydrogel	0.5	0.63	0.19	2.62	0.28	1.39
% of live cells M2b	Cyclic Stretch	M0 Plastic	0.87	1.57	0.77	1.54	2.11	0.88
% of live cells M2b	Cyclic Stretch	M0 L-Scaffold	0.6	0.84	0.66	2.39	0.63	0.31
% of live cells M2b	Cyclic Stretch	M0 L-Hydrogel	1.4	0.94	0.98	3.33	2.27	0
% of live cells M2b	Cyclic Stretch	M1 Plastic	1.62	1.95	2.69	1.17	0	3.36
% of live cells M2b	Cyclic Stretch	M1 L-Scaffold	2.52	1.55	1.86	1.22	1.04	1.09
% of live cells M2b	Cyclic Stretch	M1 L-Hydrogel	2.81	1.83	1.82	0.99	2.16	0
% of live cells M2b	Cyclic Stretch	M2 Plastic	1.11	1.98	0.96	1.61	2.03	0.34
% of live cells M2b	Cyclic Stretch	M2 L-Scaffold	1.12	1.08	0.22	3.82	2.24	1.42
% of live cells M2b	Cyclic Stretch	M2 L-Hydrogel	2.73	0.14	0.89	3	0.83	2.77
% of live cells M2c	Static	M0 Plastic	4.06	0.76	0.37	0.52	0.23	0.19
% of live cells M2c	Static	M0 L-Scaffold	0.5	0.97	0.46	0.9	0.067	0.18
% of live cells M2c	Static	M0 L-Hydrogel	0.71	0.41	0.51	0	0.57	0.053
% of live cells M2c	Static	M1 Plastic	0.96	1.8	0.58	0	0	0
% of live cells M2c	Static	M1 L-Scaffold	0.48	3.16	5.26	0	0	0
% of live cells M2c	Static	M1 L-Hydrogel	1.45	1.14	7.34	0	0	0
% of live cells M2c	Static	M2 Plastic	4.83	10.8	3.24	1.66	1.94	1.58
% of live cells M2c	Static	M2 L-Scaffold	24.3	9.57	6.44	1.61	2.76	1.34
% of live cells M2c	Static	M2 L-Hydrogel	9.69	1.48	5.47	1.84	1.48	1.9
% of live cells M2c	Cyclic Stretch	M0 Plastic	1.29	0.87	0.79	0.16	0.53	0.61
% of live cells M2c	Cyclic Stretch	M0 L-Scaffold	0.55	1.41	0.72	0.4	0.17	0.087
% of live cells M2c	Cyclic Stretch	M0 L-Hydrogel	0.7	0.6	1.45	0.18	0.97	0.75
% of live cells M2c	Cyclic Stretch	M1 Plastic	0.18	0.74	1.74	0	0	0
% of live cells M2c	Cyclic Stretch	M1 L-Scaffold	0.47	4.33	7.42	0	0.35	0
% of live cells M2c	Cyclic Stretch	M1 L-Hydrogel	1.83	0.61	3.51	0	0	0
% of live cells M2c	Cyclic Stretch	M2 Plastic	7.48	9.69	7.24	1.03	1.65	0.67
% of live cells M2c	Cyclic Stretch	M2 L-Scaffold	9.05	7.96	2.51	0.95	2.32	2.62
% of live cells M2c	Cyclic Stretch	M2 L-Hydrogel	6.5	2.09	10.7	1.02	1.59	3.17
