# Supplementary figures and images for: hLMSC Secretome Affects Macrophage Activity Differentially Depending on Lung-Mimetic Environments
Source: MDPI journal article supplement (doi:10.3390/cells11121866), 2022-06-08

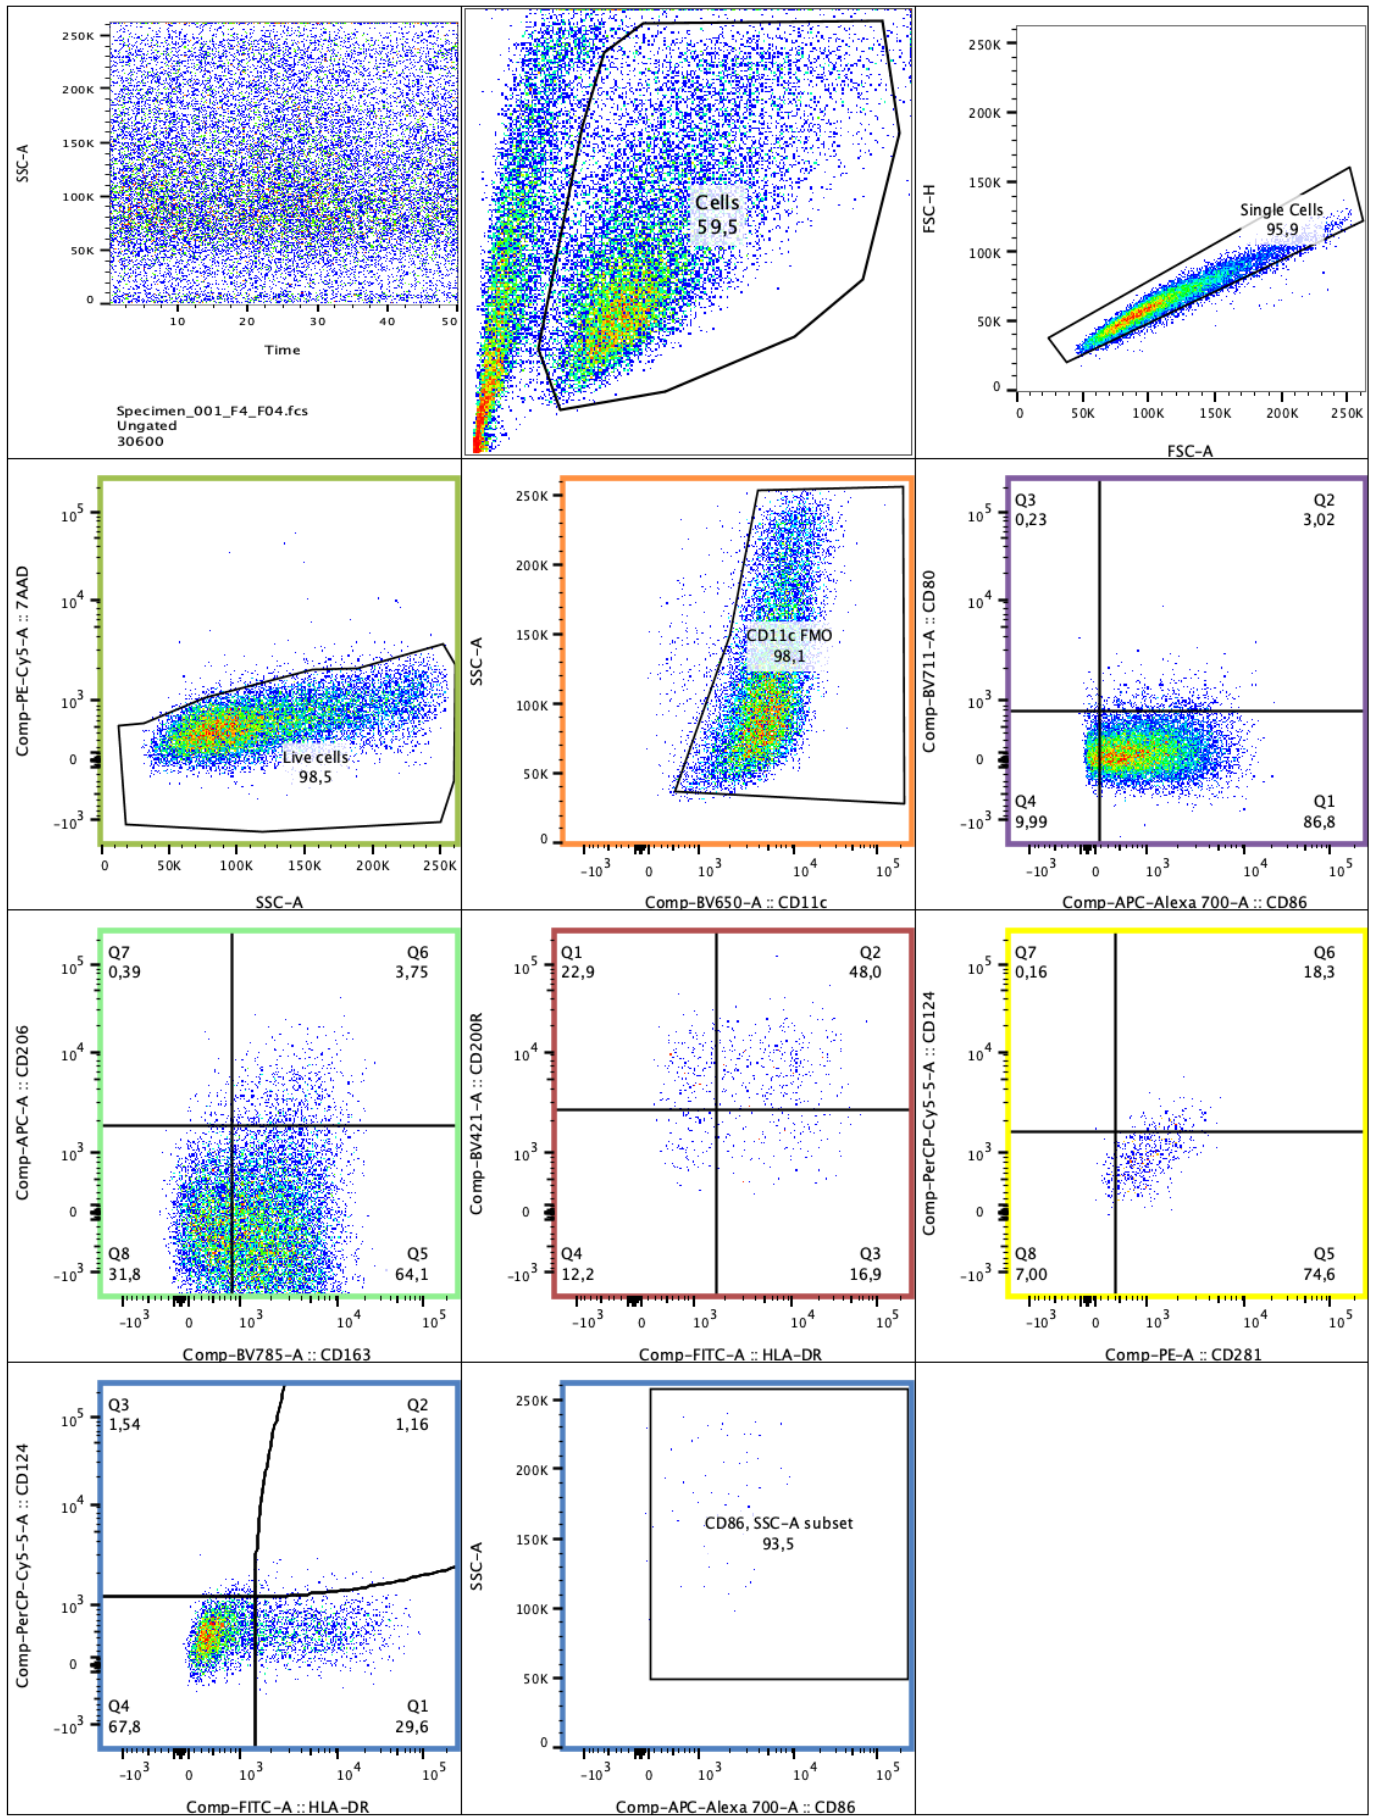

Supplement: s1 [file s1]
